# Supplementary material
Source: MDPI journal article supplement (https://www.mdpi.com/1996-1073/12/24/4724)
Supplement: s1 [file s1]

## Article

# Changes in Energy Consumption, Economic Growth and Aspirations for Energy Independence: Sectoral Analysis of Uses of Natural Gas in Ukrainian Economy

Olexandr Yemelianov <sup>1</sup>, Anastasiya Symak <sup>1</sup>, Tetyana Petrushka <sup>1</sup>, Olena Zahoretska <sup>1</sup>, Myroslava Kusiya <sup>2</sup>, Roman Lesyk <sup>3,4</sup> and Lilia Lesyk <sup>1,\*</sup>

<sup>1</sup> Department of Business Economics and Investment, Institute of Economics and Management, Lviv Polytechnic National University, 5 Metropolitian Andrey str., Building 4, 79005 Lviv, Ukraine; Olexandr.Y.Yemelianov@lpnu.ua (O.Y.), asimak@ukr.net (A.S.), petrushkat24@ukr.net (T.P.), zagoreckao@gmail.com (O.Z.)

<sup>2</sup> Department of Applied Mathematics and Mechanics, Institute of Civil Defense, Lviv State University of Life Safety, 35, Kleparivska St., 79007 Lviv, Ukraine; kusijmiroslava@gmail.com;

<sup>3</sup> Danylo Halytsky Lviv National Medical University, Department of Pharmaceutical, Organic and Bioorganic Chemistry, Pekarska 69, 79010 Lviv-10, Ukraine; dr\_r\_lesyk@org.lviv.net

<sup>4</sup> Department of Public Health, Dietetics and Lifestyle Disorders, Faculty of Medicine, University of Information Technology and Management in Rzeszow, Sucharskiego 2, 35-225 Rzeszow, Poland

\* Correspondence: lilia.lesyk@gmail.com; Tel.: +380-322-582545

Received: 26 August 2019; Accepted: 10 December 2019; Published: date

## Supplementary Information

**Table S1.** Indicators of the ratio between real gross domestic product (GDP) and natural gas consumption by country <sup>1</sup>.

| Countries      | Real GDP (at Constant Prices of 2010), Billion USD |          |                | Volume of Consumption of Natural Gas, Billion Cubic Meters |       |                | Ratio of Real GDP to the Volume of Natural Gas Consumption, USD per Cubic Meter of Gas |        |                |
|----------------|----------------------------------------------------|----------|----------------|------------------------------------------------------------|-------|----------------|----------------------------------------------------------------------------------------|--------|----------------|
|                | 2010                                               | 2017     | Growth Rate, % | 2010                                                       | 2017  | Growth Rate, % | 2010                                                                                   | 2017   | Growth Rate, % |
| USA            | 14,992.0                                           | 17,348.6 | 15.72          | 648.2                                                      | 739.5 | 14.09          | 23.13                                                                                  | 23.46  | 1.43           |
| China          | 6100.6                                             | 10,161.0 | 66.56          | 108.9                                                      | 240.4 | 120.75         | 56.02                                                                                  | 42.27  | −24.55         |
| Australia      | 1144.3                                             | 1375.7   | 20.22          | 33.8                                                       | 41.9  | 23.96          | 33.86                                                                                  | 32.83  | −3.02          |
| Austria        | 391.9                                              | 432.8    | 10.44          | 9.4                                                        | 9.0   | −4.26          | 41.69                                                                                  | 48.09  | 15.34          |
| Belgium        | 483.5                                              | 525.5    | 8.69           | 19.8                                                       | 16.4  | −17.17         | 24.42                                                                                  | 32.04  | 31.22          |
| Czech Republic | 207.5                                              | 241.1    | 16.19          | 9.4                                                        | 8.4   | −10.64         | 22.07                                                                                  | 28.70  | 30.03          |
| Finland        | 247.8                                              | 262.0    | 5.73           | 4.1                                                        | 1.8   | −56.10         | 60.44                                                                                  | 145.56 | 140.83         |
| France         | 2642.6                                             | 2874.7   | 8.78           | 49.6                                                       | 44.7  | −9.88          | 53.28                                                                                  | 64.31  | 20.71          |
| Germany        | 3417.1                                             | 3883.9   | 13.66          | 88.1                                                       | 90.2  | 2.38           | 38.79                                                                                  | 43.06  | 11.01          |
| Hungary        | 130.9                                              | 153.6    | 17.34          | 11.4                                                       | 9.9   | −13.16         | 11.48                                                                                  | 15.52  | 35.12          |
| Italy          | 2125.1                                             | 2118.8   | −0.30          | 79.7                                                       | 72.1  | −9.54          | 26.66                                                                                  | 29.39  | 10.21          |
| Netherlands    | 846.6                                              | 923.7    | 9.11           | 45.6                                                       | 36.1  | −20.83         | 18.57                                                                                  | 25.59  | 37.82          |
| Poland         | 479.3                                              | 600.9    | 25.37          | 16.2                                                       | 19.1  | 17.90          | 29.59                                                                                  | 31.46  | 6.34           |
| Romania        | 166.2                                              | 216.3    | 30.14          | 12.5                                                       | 11.9  | −4.80          | 13.30                                                                                  | 18.18  | 36.71          |
| Spain          | 1431.6                                             | 1509.8   | 5.46           | 36.2                                                       | 32.0  | −11.60         | 39.55                                                                                  | 47.18  | 19.30          |
| Turkey         | 771.9                                              | 1206.0   | 56.24          | 35.8                                                       | 51.7  | 44.41          | 21.56                                                                                  | 23.33  | 8.19           |
| United Kingdom | 2452.9                                             | 2818.7   | 14.91          | 98.5                                                       | 78.8  | −20.00         | 24.90                                                                                  | 35.77  | 43.64          |

<sup>1</sup> Sources of input information: [63,64]

**Table S2.** Input data and decomposition results of the growth rate of natural gas consumption by Ukrainian industry for 2008–2017 <sup>1</sup>.

| Years | Index of Natural gas Consumption (Relative to the Previous Year), times | Index of Physical Volumes of Sales of Products (Relative to the Previous Year), times | Index of Natural Gas Consumption per Unit of Physical Volume of Production (Relative to the Previous Year), times | The Growth Rate of Natural Gas Consumption (Compared to the Previous Year), share of unit |                                         |                                                                              |                                 |
|-------|-------------------------------------------------------------------------|---------------------------------------------------------------------------------------|-------------------------------------------------------------------------------------------------------------------|-------------------------------------------------------------------------------------------|-----------------------------------------|------------------------------------------------------------------------------|---------------------------------|
|       |                                                                         |                                                                                       |                                                                                                                   | Total                                                                                     | Including Due to                        |                                                                              |                                 |
|       |                                                                         |                                                                                       |                                                                                                                   |                                                                                           | Changes in Physical Volumes of Products | Changes in the Volume of Natural Gas Consumption per Unit of Physical Output | Joint Influence of Both Factors |
| 2008  | 0.90                                                                    | 0.95                                                                                  | 0.95                                                                                                              | 0.10                                                                                      | 0.05                                    | 0.05                                                                         | 0.00                            |
| 2009  | 0.58                                                                    | 0.78                                                                                  | 0.74                                                                                                              | 0.42                                                                                      | 0.22                                    | 0.26                                                                         | −0.06                           |
| 2010  | 1.15                                                                    | 1.12                                                                                  | 1.03                                                                                                              | −0.15                                                                                     | −0.12                                   | −0.03                                                                        | 0.00                            |
| 2011  | 1.02                                                                    | 1.08                                                                                  | 0.95                                                                                                              | −0.02                                                                                     | −0.08                                   | 0.05                                                                         | 0.00                            |
| 2012  | 0.80                                                                    | 0.99                                                                                  | 0.81                                                                                                              | 0.20                                                                                      | 0.01                                    | 0.19                                                                         | 0.00                            |
| 2013  | 0.83                                                                    | 0.96                                                                                  | 0.86                                                                                                              | 0.17                                                                                      | 0.04                                    | 0.14                                                                         | −0.01                           |
| 2014  | 0.76                                                                    | 0.90                                                                                  | 0.85                                                                                                              | 0.24                                                                                      | 0.10                                    | 0.15                                                                         | −0.02                           |
| 2015  | 0.83                                                                    | 0.87                                                                                  | 0.96                                                                                                              | 0.17                                                                                      | 0.13                                    | 0.04                                                                         | −0.01                           |
| 2016  | 0.90                                                                    | 1.03                                                                                  | 0.87                                                                                                              | 0.10                                                                                      | −0.03                                   | 0.13                                                                         | 0.00                            |
| 2017  | 1.06                                                                    | 1.00                                                                                  | 1.06                                                                                                              | −0.06                                                                                     | 0.00                                    | −0.06                                                                        | 0.00                            |

<sup>1</sup> Sources of input information: [65,67]

**Table S3.** Input data and results of decomposition of changes in volumes of natural gas consumption by industrial sectors of Ukraine in 2017 compared to 2007 <sup>1</sup>.

| Industry Sectors                            | Volume of Natural Gas Consumption, thousand tons of oil equivalent |      | Index of Physical Volumes of Production (in 2017 compared to 2007), times | Change in Natural Gas Consumption in 2017 compared to 2007, thousand tons of oil equivalent |                                                        |                                                                                             | The Share of Changes in the Volume of Natural Gas Consumption due to Increased Efficiency of its Use in the Total Change in Consumption, % |
|---------------------------------------------|--------------------------------------------------------------------|------|---------------------------------------------------------------------------|---------------------------------------------------------------------------------------------|--------------------------------------------------------|---------------------------------------------------------------------------------------------|--------------------------------------------------------------------------------------------------------------------------------------------|
|                                             | 2007                                                               | 2017 |                                                                           | Total                                                                                       | As a Result of Changes in Physical Volumes of Products | As a Result of Changes in the Volume of Natural Gas Consumption per unit of Physical Output |                                                                                                                                            |
| Ferrous metallurgy                          | 6019                                                               | 1398 | 0.59                                                                      | −4621                                                                                       | −1894.6                                                | −2801.9                                                                                     | 60.63                                                                                                                                      |
| Chemical and petrochemical industry         | 679                                                                | 141  | 0.75                                                                      | −538                                                                                        | −134.5                                                 | −389.0                                                                                      | 72.31                                                                                                                                      |
| Color metallurgy                            | 240                                                                | 144  | 0.68                                                                      | −96                                                                                         | −30.7                                                  | −11.3                                                                                       | 11.76                                                                                                                                      |
| Production of non-metallic mineral products | 2399                                                               | 338  | 0.77                                                                      | −2061                                                                                       | −474.0                                                 | −1683.9                                                                                     | 81.70                                                                                                                                      |
| Production of transport equipment           | 100                                                                | 21   | 0.42                                                                      | −79                                                                                         | −45.8                                                  | −39.5                                                                                       | 50.00                                                                                                                                      |
| Machine building                            | 343                                                                | 122  | 0.54                                                                      | −221                                                                                        | −101.7                                                 | −75.4                                                                                       | 34.13                                                                                                                                      |
| Mining industry                             | 467                                                                | 266  | 0.71                                                                      | −201                                                                                        | −58.3                                                  | −39.7                                                                                       | 19.78                                                                                                                                      |
| Food and tobacco industry                   | 303                                                                | 151  | 0.91                                                                      | −152                                                                                        | −13.7                                                  | −68.8                                                                                       | 45.24                                                                                                                                      |
| Pulp and paper and printing industry        | 31                                                                 | 18   | 0.76                                                                      | −13                                                                                         | −3.1                                                   | −3.1                                                                                        | 23.60                                                                                                                                      |
| Woodworking industry                        | 55                                                                 | 3    | 1.02                                                                      | −52                                                                                         | 1.0                                                    | −49.2                                                                                       | 94.65                                                                                                                                      |
| Construction                                | 65                                                                 | 9    | 0.49                                                                      | −56                                                                                         | −28.6                                                  | −40.2                                                                                       | 71.74                                                                                                                                      |
| Textile and leather industry                | 7                                                                  | 5    | 0.82                                                                      | −2                                                                                          | −0.4                                                   | −0.3                                                                                        | 12.89                                                                                                                                      |

<sup>1</sup> Sources of input information: [65,66]

**Table S4.** Indicators of the dynamics of added value and volumes of natural gas consumption in industry in Ukraine for 2008–2017 <sup>1</sup>.

| <b>Years</b> | <b>Index of Real Added Value (relative to the previous year)</b> | <b>Index of Natural Gas Consumption (relative to the previous year)</b> | <b>Index of Efficiency of Use of Natural Gas on the Indicator of Real Added Value (relative to the previous year)</b> |
|--------------|------------------------------------------------------------------|-------------------------------------------------------------------------|-----------------------------------------------------------------------------------------------------------------------|
| 2008         | 1.09                                                             | 0.90                                                                    | 1.21                                                                                                                  |
| 2009         | 0.92                                                             | 0.58                                                                    | 1.59                                                                                                                  |
| 2010         | 1.26                                                             | 1.15                                                                    | 1.10                                                                                                                  |
| 2011         | 1.19                                                             | 1.02                                                                    | 1.17                                                                                                                  |
| 2012         | 1.14                                                             | 0.80                                                                    | 1.43                                                                                                                  |
| 2013         | 0.97                                                             | 0.83                                                                    | 1.17                                                                                                                  |
| 2014         | 0.74                                                             | 0.76                                                                    | 0.97                                                                                                                  |
| 2015         | 0.83                                                             | 0.83                                                                    | 1.00                                                                                                                  |
| 2016         | 1.19                                                             | 0.90                                                                    | 1.32                                                                                                                  |
| 2017         | 1.11                                                             | 1.06                                                                    | 1.05                                                                                                                  |

<sup>1</sup> Sources of input information: [65,67]

**Table S5.** Indicators of the dynamics of added value and volumes of natural gas consumption by industries of Ukraine in 2008–2016.

| Industries                                  | Real Added Value Index    |                           | Index of Natural Gas Consumption |                           | Index of Efficiency of Use of Natural Gas on the Indicator of Real Added Value |                           |
|---------------------------------------------|---------------------------|---------------------------|----------------------------------|---------------------------|--------------------------------------------------------------------------------|---------------------------|
|                                             | In 2012, Compared to 2008 | In 2016, Compared to 2012 | In 2012, Compared to 2008        | In 2016, Compared to 2012 | In 2012, Compared to 2008                                                      | In 2016, Compared to 2012 |
| Ferrous metallurgy                          | 0.935                     | 0.908                     | 0.598                            | 0.379                     | 1.563                                                                          | 2.397                     |
| Chemical and petrochemical industry         | 1.292                     | 0.656                     | 0.702                            | 0.519                     | 1.841                                                                          | 1.264                     |
| Color metallurgy                            | 1.113                     | 1.029                     | 0.544                            | 0.949                     | 2.046                                                                          | 1.085                     |
| Production of non-metallic mineral products | 0.987                     | 1.073                     | 0.236                            | 0.655                     | 4.175                                                                          | 1.638                     |
| Production of transport equipment           | 1.032                     | 0.406                     | 1.713                            | 0.109                     | 0.603                                                                          | 3.705                     |
| Machine building                            | 0.937                     | 0.533                     | 0.687                            | 0.461                     | 1.365                                                                          | 1.155                     |
| Mining industry                             | 1.069                     | 0.792                     | 0.817                            | 0.857                     | 1.308                                                                          | 0.924                     |
| Food and tobacco industry                   | 1.078                     | 0.769                     | 0.893                            | 0.555                     | 1.208                                                                          | 1.386                     |
| Pulp and paper and printing industry        | 0.906                     | 1.167                     | 0.839                            | 0.692                     | 1.081                                                                          | 1.685                     |
| Woodworking industry                        | 0.933                     | 1.422                     | 0.432                            | 0.158                     | 2.159                                                                          | 9.009                     |
| Construction                                | 0.876                     | 0.597                     | 0.574                            | 0.323                     | 1.526                                                                          | 1.851                     |
| Textile and leather industry                | 1.039                     | 1.040                     | 1.143                            | 0.625                     | 0.909                                                                          | 1.663                     |

**Table S6.** Input data to determine the impact of the share of costs on purchasing natural gas in the amount of operating costs by industry in Ukraine on the change in the efficiency of consumption of natural gas <sup>1</sup>.

| Industry Sectors                            | The Share of Expenses for the Purchase of Natural Gas in the Total Operating Expenses in 2012, % | Index of Natural Gas Consumption per unit of Physical Output in 2016 Relative to 2012, times | Relative Growth of Operating Expenses as a Result of Increase in Prices for Natural Gas in 2016 Relative to 2012, % |
|---------------------------------------------|--------------------------------------------------------------------------------------------------|----------------------------------------------------------------------------------------------|---------------------------------------------------------------------------------------------------------------------|
| Ferrous metallurgy                          | 12.7                                                                                             | 0.533                                                                                        | 8.5                                                                                                                 |
| Chemical and petrochemical industry         | 13.9                                                                                             | 0.849                                                                                        | 8.9                                                                                                                 |
| Color metallurgy                            | 10.9                                                                                             | 0.538                                                                                        | 3.4                                                                                                                 |
| Production of non-metallic mineral products | 6.7                                                                                              | 0.530                                                                                        | 2.9                                                                                                                 |
| Production of transport equipment           | 11.2                                                                                             | 0.756                                                                                        | 4.6                                                                                                                 |
| Machine building                            | 11.7                                                                                             | 0.764                                                                                        | 2.4                                                                                                                 |
| Mining industry                             | 12.3                                                                                             | 1.152                                                                                        | 5.8                                                                                                                 |
| Food and tobacco industry                   | 10.2                                                                                             | 0.612                                                                                        | 4.9                                                                                                                 |
| Pulp and paper and printing industry        | 5.6                                                                                              | 0.549                                                                                        | 2.7                                                                                                                 |
| Woodworking industry                        | 7.5                                                                                              | 0.645                                                                                        | 3.0                                                                                                                 |
| Construction                                | 3.1                                                                                              | 0.843                                                                                        | 2.6                                                                                                                 |
| Textile and leather industry                | 5.9                                                                                              | 0.516                                                                                        | 1.7                                                                                                                 |

<sup>1</sup> Sources of input information: [65,67].

**Table S7.** Division of Ukrainian industrial sectors into sub-sectors.

| Industry Sectors                            | Number of Sub-Sectors | Industry Sub-Sectors                                                                                                                                                                                                          |
|---------------------------------------------|-----------------------|-------------------------------------------------------------------------------------------------------------------------------------------------------------------------------------------------------------------------------|
| Ferrous metallurgy                          | 5                     | Production of pig iron; steel production; production of steel and cast iron pipes; coke industry; production of other metallurgical products                                                                                  |
| Chemical and petrochemical industry         | 4                     | Manufacture of basic chemical products, fertilizers, nitrogen compounds, plastics and synthetic rubber; production of other types of chemical products; petrochemical industry                                                |
| Color metallurgy                            | 5                     | Production: aluminum; copper; titanium and magnesium; lead and zinc; other metallurgical products                                                                                                                             |
| Production of non-metallic mineral products | 8                     | Production: rubber products; plastic products; glass and glassware; refractory products; clay building materials; other porcelain and ceramic products; cement, lime and gypsum mixtures; other non-metallic mineral products |
| Production of transport equipment           | 5                     | Manufacture: motor vehicles; trailers and semi-trailers; assemblies and parts for vehicles; iron locomotives; other vehicles                                                                                                  |
| Machine-building                            | 5                     | Manufacture: computers, electronic and optical products; electrical equipment; general purpose equipment; metalworking machines; other types of engineering products                                                          |
| Mining industry                             | 3                     | Mining of coal and lignite; production of oil and natural gas; mining of other minerals                                                                                                                                       |
| Food and tobacco industry                   | 3                     | Production: food; drinks; tobacco products                                                                                                                                                                                    |
| Pulp and paper and printing industry        | 2                     | The pulp and paper industry; printing industry                                                                                                                                                                                |
| Woodworking industry                        | 3                     | Production: wood; wood products, except furniture; manufacture of furniture                                                                                                                                                   |
| Construction                                | 3                     | Housing; industrial construction; other types of construction                                                                                                                                                                 |
| Textile and leather industry                | 4                     | Textile production; production of clothing; leather production; production of leather goods                                                                                                                                   |

Table S8. Some indicators of activity of industrial sub-sectors of Ukraine.

| Sub-Sectors Numbering | $s_0$ , % | $I_e$ , times | $\Delta C_{opr}$ , % | $I_{va}$ , times | $I_{E_r}$ , times |
|-----------------------|-----------|---------------|----------------------|------------------|-------------------|
| 1                     | 11.9      | 0.564         | 9.3                  | 0.875            | 0.402             |
| 2                     | 13.0      | 0.676         | 8.6                  | 0.816            | 0.387             |
| 3                     | 9.4       | 0.512         | 5.8                  | 1.058            | 0.326             |
| 4                     | 12.3      | 0.558         | 9.0                  | 0.919            | 0.376             |
| 5                     | 12.9      | 0.625         | 8.8                  | 0.890            | 0.381             |
| 6                     | 13.6      | 0.819         | 9.3                  | 0.707            | 0.568             |
| 7                     | 14.2      | 0.924         | 8.8                  | 0.621            | 0.612             |
| 8                     | 12.5      | 0.851         | 9.6                  | 0.664            | 0.459             |
| 9                     | 14.0      | 0.889         | 9.1                  | 0.634            | 0.537             |
| 10                    | 9.2       | 0.586         | 2.8                  | 1.013            | 0.912             |
| 11                    | 11.5      | 0.617         | 4.2                  | 1.008            | 1.012             |
| 12                    | 9.6       | 0.530         | 3.5                  | 1.047            | 0.879             |
| 13                    | 11.8      | 0.608         | 5.1                  | 1.005            | 1.087             |
| 14                    | 9.4       | 0.511         | 3.0                  | 1.043            | 0.972             |
| 15                    | 4.5       | 0.635         | 2.6                  | 0.967            | 0.834             |
| 16                    | 7.8       | 0.479         | 3.4                  | 1.113            | 0.560             |
| 17                    | 6.3       | 0.508         | 3.6                  | 1.098            | 0.498             |
| 18                    | 3.9       | 0.679         | 2.7                  | 1.076            | 0.713             |
| 19                    | 4.2       | 0.647         | 2.2                  | 0.945            | 0.785             |
| 20                    | 8.4       | 0.535         | 3.1                  | 1.156            | 0.613             |
| 21                    | 3.5       | 0.629         | 2.8                  | 0.987            | 0.679             |
| 22                    | 2.7       | 0.708         | 2.2                  | 1.067            | 0.652             |
| 23                    | 9.1       | 0.562         | 3.8                  | 0.753            | 0.213             |
| 24                    | 11.9      | 0.830         | 5.6                  | 0.345            | 0.112             |
| 25                    | 13.0      | 0.812         | 5.2                  | 0.401            | 0.102             |
| 26                    | 11.4      | 0.785         | 5.7                  | 0.326            | 0.208             |
| 27                    | 9.5       | 0.526         | 3.4                  | 0.288            | 0.095             |
| 28                    | 10.1      | 0.665         | 3.7                  | 0.312            | 0.079             |
| 29                    | 12.0      | 0.822         | 4.1                  | 0.589            | 0.398             |
| 30                    | 11.5      | 0.765         | 4.3                  | 0.603            | 0.536             |
| 31                    | 10.3      | 0.674         | 1.6                  | 0.457            | 0.424             |
| 32                    | 11.9      | 0.851         | 2.2                  | 0.523            | 0.483             |
| 33                    | 11.6      | 1.098         | 5.5                  | 0.834            | 0.765             |
| 34                    | 13.2      | 1.179         | 6.1                  | 0.765            | 1.038             |
| 35                    | 12.2      | 1.156         | 5.3                  | 0.722            | 0.809             |
| 36                    | 9.6       | 0.527         | 4.1                  | 1.025            | 0.578             |
| 37                    | 8.5       | 0.543         | 4.4                  | 1.037            | 0.488             |
| 38                    | 11.7      | 0.678         | 5.7                  | 0.719            | 0.673             |
| 39                    | 10.9      | 0.632         | 6.3                  | 0.675            | 0.514             |
| 40                    | 4.1       | 0.608         | 2.5                  | 0.914            | 0.667             |
| 41                    | 7.2       | 0.509         | 3.1                  | 1.326            | 0.714             |
| 42                    | 8.3       | 0.528         | 3.9                  | 1.521            | 0.214             |
| 43                    | 4.9       | 0.564         | 2.6                  | 0.998            | 0.135             |
| 44                    | 7.7       | 0.473         | 3.0                  | 1.608            | 0.157             |
| 45                    | 2.6       | 0.876         | 1.9                  | 0.612            | 0.316             |
| 46                    | 3.5       | 0.816         | 2.4                  | 0.724            | 0.376             |
| 47                    | 2.8       | 0.852         | 2.2                  | 0.507            | 0.276             |
| 48                    | 4.7       | 0.658         | 1.5                  | 0.987            | 0.734             |
| 49                    | 6.8       | 0.468         | 2.6                  | 1.113            | 0.567             |
| 50                    | 4.2       | 0.539         | 1.2                  | 0.956            | 0.617             |

<sup>1</sup> Designation of indicators:  $s_0$ —share cost of purchasing natural gas in total operating expenses in 2012,%;  $I_e$ —index of natural gas consumption per unit of physical output in 2016 relative to 2012, times;  $\Delta C_{op}$ —relative growth of operating expenses as a result of increase in prices for natural gas in



2016 relative to 2012,%;  $I_{Va}$ —sectoral (industry) value added index in 2016 relative to 2012, times;  
 $I_E$ —sectoral index of volumes of consumption of natural gas, times.

**Table S9.** Dynamics of natural gas consumption and production in Ukraine and indicators of dependence on its import for 2007–2017 <sup>1</sup>.

| Years | Total Consumption of Natural Gas, billion m <sup>3</sup> | Own Production of Natural Gas, billion m <sup>3</sup> | Level of Dependence on Imports of Natural Gas |                                  |
|-------|----------------------------------------------------------|-------------------------------------------------------|-----------------------------------------------|----------------------------------|
|       |                                                          |                                                       | Absolute Value, billion m <sup>3</sup>        | Relative to Total Consumption, % |
| 2007  | 69.8                                                     | 20.0                                                  | 49.8                                          | 71.35                            |
| 2008  | 66.3                                                     | 20.3                                                  | 46.0                                          | 69.38                            |
| 2009  | 51.9                                                     | 20.3                                                  | 31.6                                          | 60.89                            |
| 2010  | 57.6                                                     | 19.4                                                  | 38.2                                          | 66.32                            |
| 2011  | 59.3                                                     | 19.5                                                  | 39.8                                          | 67.12                            |
| 2012  | 54.8                                                     | 19.4                                                  | 35.4                                          | 64.60                            |
| 2013  | 50.4                                                     | 20.2                                                  | 30.2                                          | 59.92                            |
| 2014  | 42.6                                                     | 20.2                                                  | 22.4                                          | 52.58                            |
| 2015  | 33.8                                                     | 18.8                                                  | 15.0                                          | 44.38                            |
| 2016  | 32.0                                                     | 19.0                                                  | 13.0                                          | 40.63                            |
| 2017  | 31.5                                                     | 19.4                                                  | 12.1                                          | 38.41                            |

<sup>1</sup> Sources of input information: [63,65].

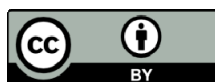

© 2019 by the authors. Submitted for possible open access publication under the terms and conditions of the Creative Commons Attribution (CC BY) license (<http://creativecommons.org/licenses/by/4.0/>).
